# Supplementary material for: Eucommiae cortex polysaccharides mitigate obesogenic diet-induced cognitive and social dysfunction via modulation of gut microbiota and tryptophan metabolism
Source: Theranostics. 2022 May 1;12(8):3637–55. doi: 10.7150/thno.72756 (PMC9131264; doi:10.7150/thno.72756)
Supplement: Supplementary file 1 — Supplementary figures and table. [file thnov12p3637s1.pdf]

## Supplementary Information

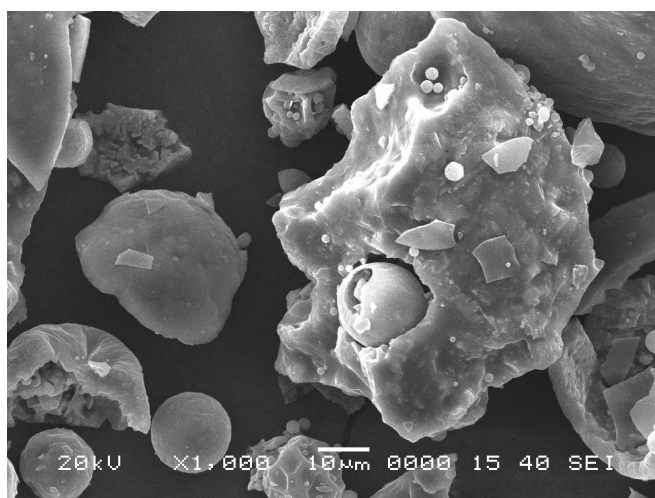

**Figure S1.** Scanning electron microscope image for EPs.

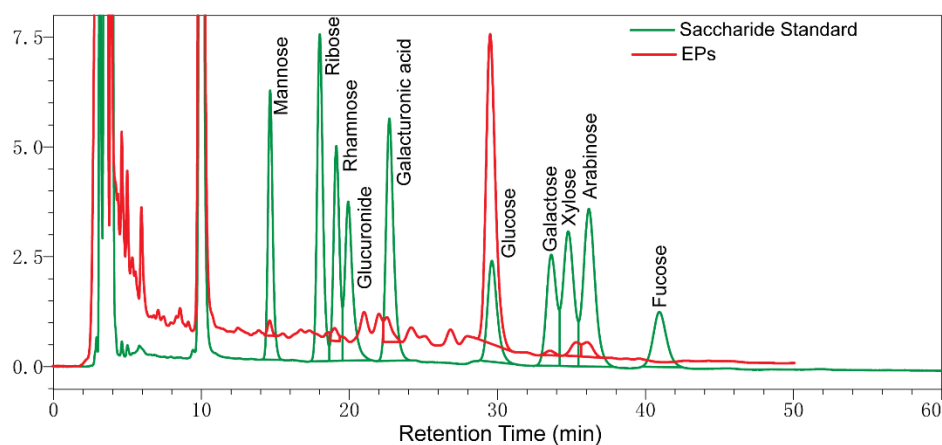

**Figure S2.** The elution profile of the saccharide standard and EPs by high-performance liquid chromatography.

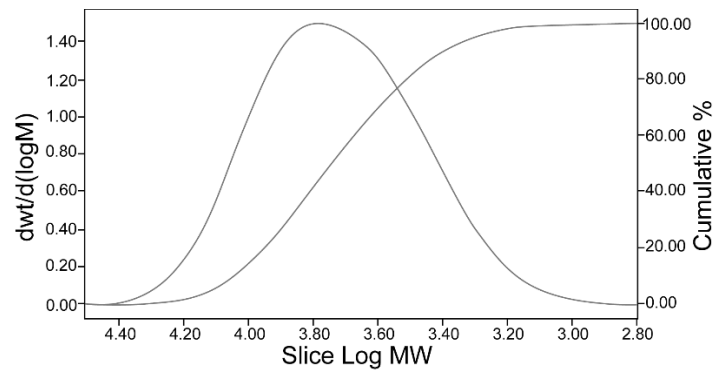

**Figure S3.** The molecular weight distribution of EPs.

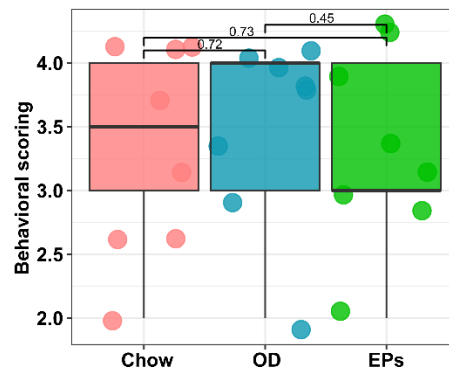

**Figure S4.** Behavioral scoring of the rotarod test ( $n = 8$  individuals/group). Statistical significance compared to each group by one-way ANOVA, adjusted for multiple comparisons by Dunnett post-hoc test.

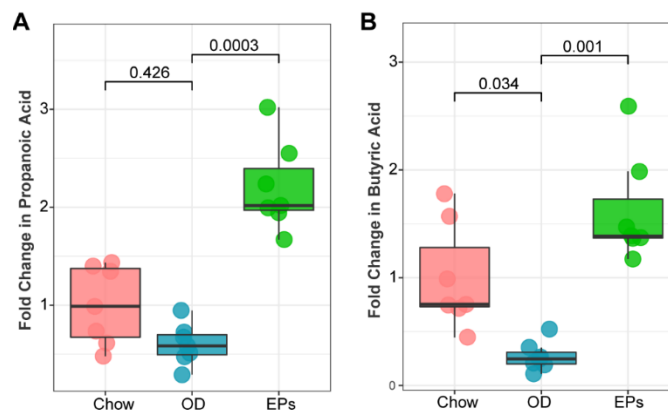

**Figure S5.** Quantitative analysis of SCFAs concentration, including propanoic acid (A) and butyric acid (B), in colon contents from three groups ( $n = 7$  individuals/group). Statistical significance compared to OD group by one-way ANOVA, adjusted for multiple comparisons by Dunnett post-hoc test.

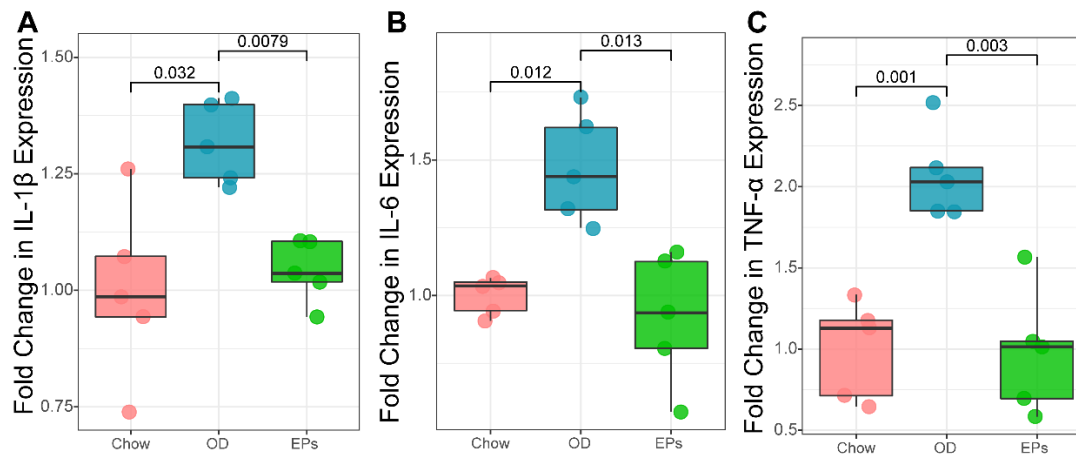

**Figure S6.** Concentrations of three representative proinflammatory cytokines, IL-1 $\beta$  (A), IL-6 (B), and TNF- $\alpha$  (C) in the hippocampus ( $n = 5$  individuals/group). Statistical significance compared to OD group by one-way ANOVA, adjusted for multiple comparisons by Dunnett post-hoc test.

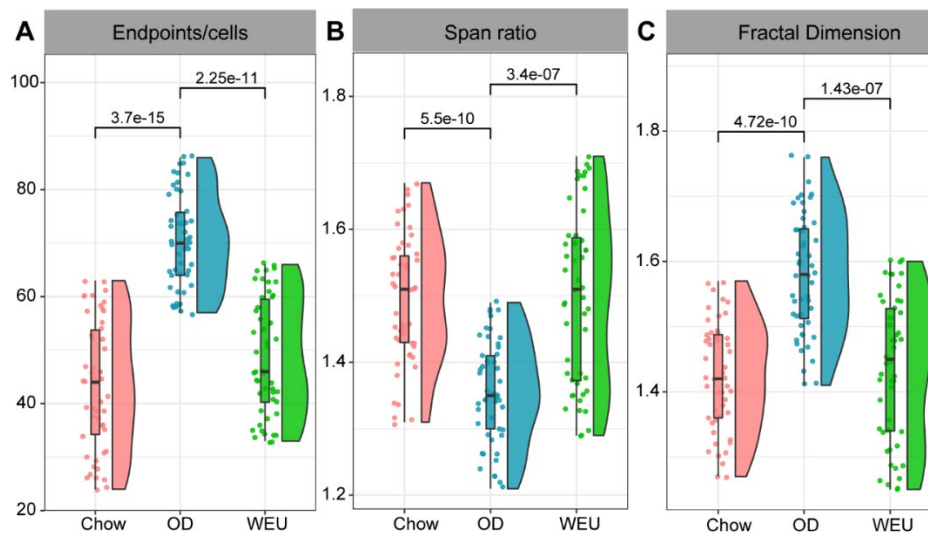

**Figure S7.** Morphological analysis of microglia.

30 Summary data and statistical analysis of endpoints (A), span ratio (B), and fractal dimension (C) between  
31 three groups.  $n = 50$  cells from 3 mice. Statistical significance compared to OD group by one-way  
32 ANOVA, adjusted for multiple comparisons by Dunnett post-hoc test.

33 **Table S1. The monosaccharide of EPs.**

| Monosaccharide (% w/w) |          |
|------------------------|----------|
| Mannose                | 1.12872  |
| Rhamnose               | 2.18416  |
| Galacturonic acid      | 3.15037  |
| Glucose                | 82.70771 |
| Galactose              | 0.79398  |
| Xylose                 | 2.01605  |
| Arabinose              | 1.99197  |
